# Supplementary material for: The synergistic effect of the RuO2 nanoparticle-decorated V2O5 heterostructure for high-performance asymmetric supercapacitors
Source: Royal Society of Chemistry journal article supplement (doi:10.1039/d1nj00011j), 2021-01-01
Supplement: d1nj00011j1.pdf [file d1nj00011j1.pdf]

**Supplementary Information**

**Synergistic effect of RuO<sub>2</sub> nanoparticles decorated V<sub>2</sub>O<sub>5</sub>  
heterostructure for high-performance asymmetric supercapacitors**

**N.S. Palani<sup>a</sup>, N.S. Kavitha<sup>b</sup>, K.S. Venkatesh<sup>c</sup>, K. Ashok Kumar<sup>d</sup>, M Senthilkumar<sup>d</sup>,**

**A. Pandurangan<sup>e</sup>, and R. Ilangoan<sup>a,b\*</sup>**

*<sup>a</sup> Department of Nanoscience and Technology, Alagappa University, Karaikudi-630003, Tamil Nadu, India.*

*<sup>b</sup> National Centre for Nanoscience and Nanotechnology, Guindy Campus, University of Madras, Chennai-600025, Tamil Nadu, India.*

*<sup>c</sup> Department of Physics, Syed Ammal Arts and Science College, Ramanathapuram, Tamil Nadu-623 513, India.*

*<sup>d</sup> Department of Nuclear Physics, Guindy Campus, University of Madras, Chennai-600025, Tamil Nadu, India.*

*<sup>e</sup> Department of Chemistry, Anna University, Chennai-600025, Tamil Nadu, India*

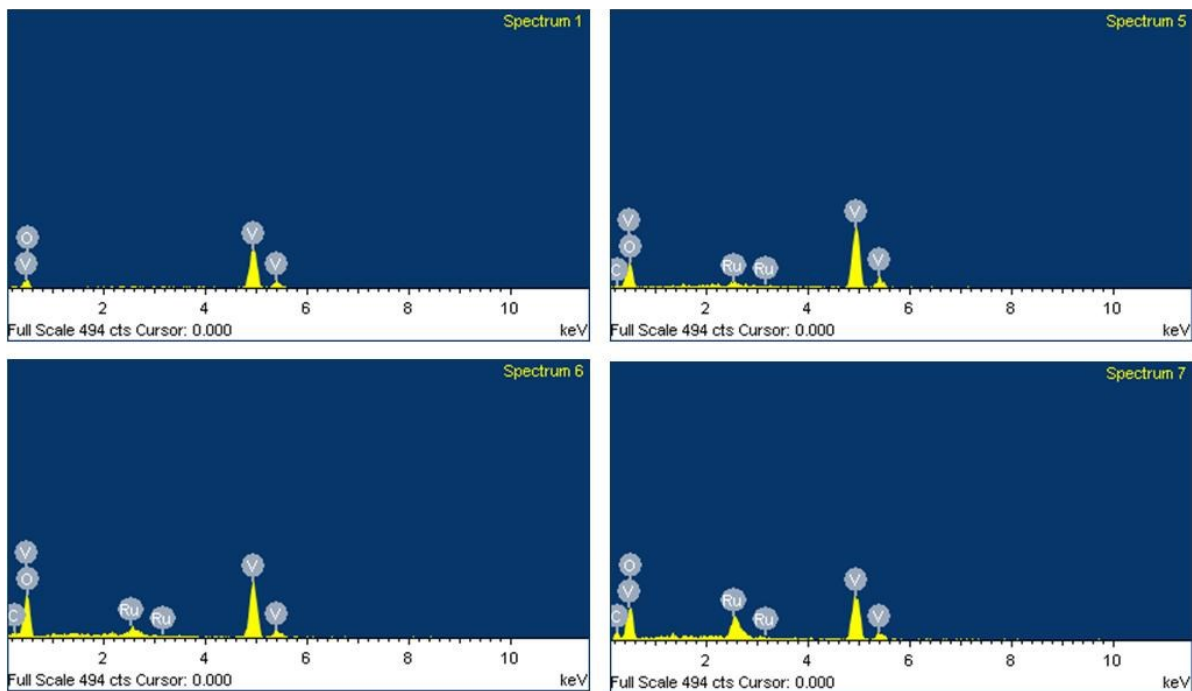

Fig.S1. EDX spectra of prepared nano composites (a) V, (b) R1, (c) R2 and (d) R3

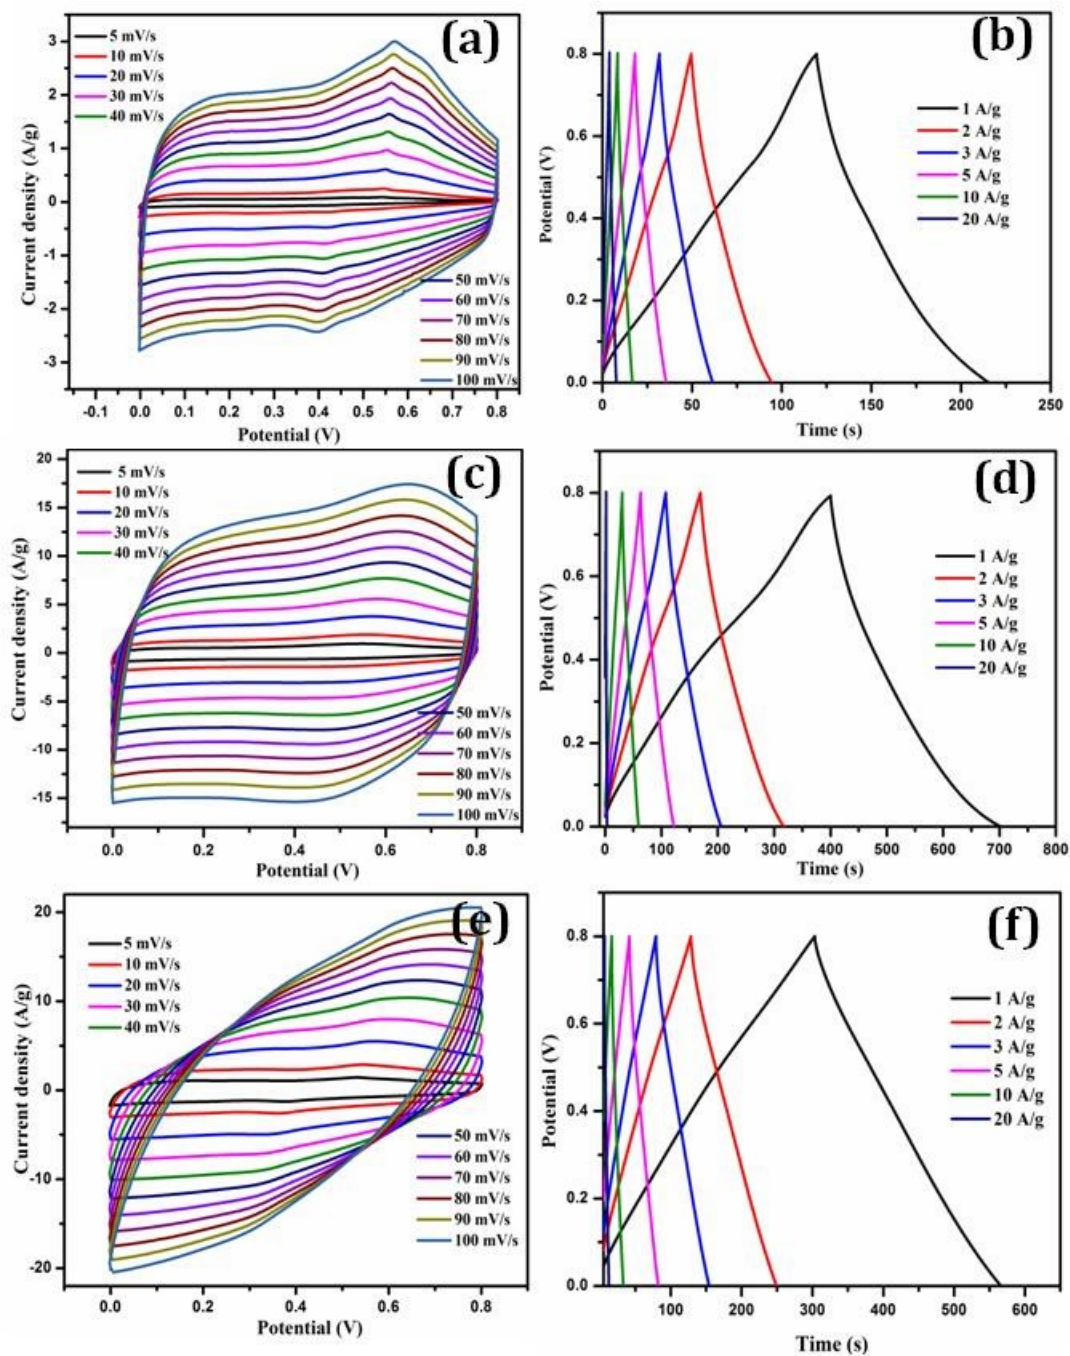

Fig.S2. ((a), (c) and (e)) Cyclic voltammetry curve of V, R1 and R2 at scan rates from 5 to 100 mV/s ,( b), (d) and (f)) Galvanostatic charge-discharge curves of V, R1 and R2 at current densities from 1 to 20 A/g , respectively.

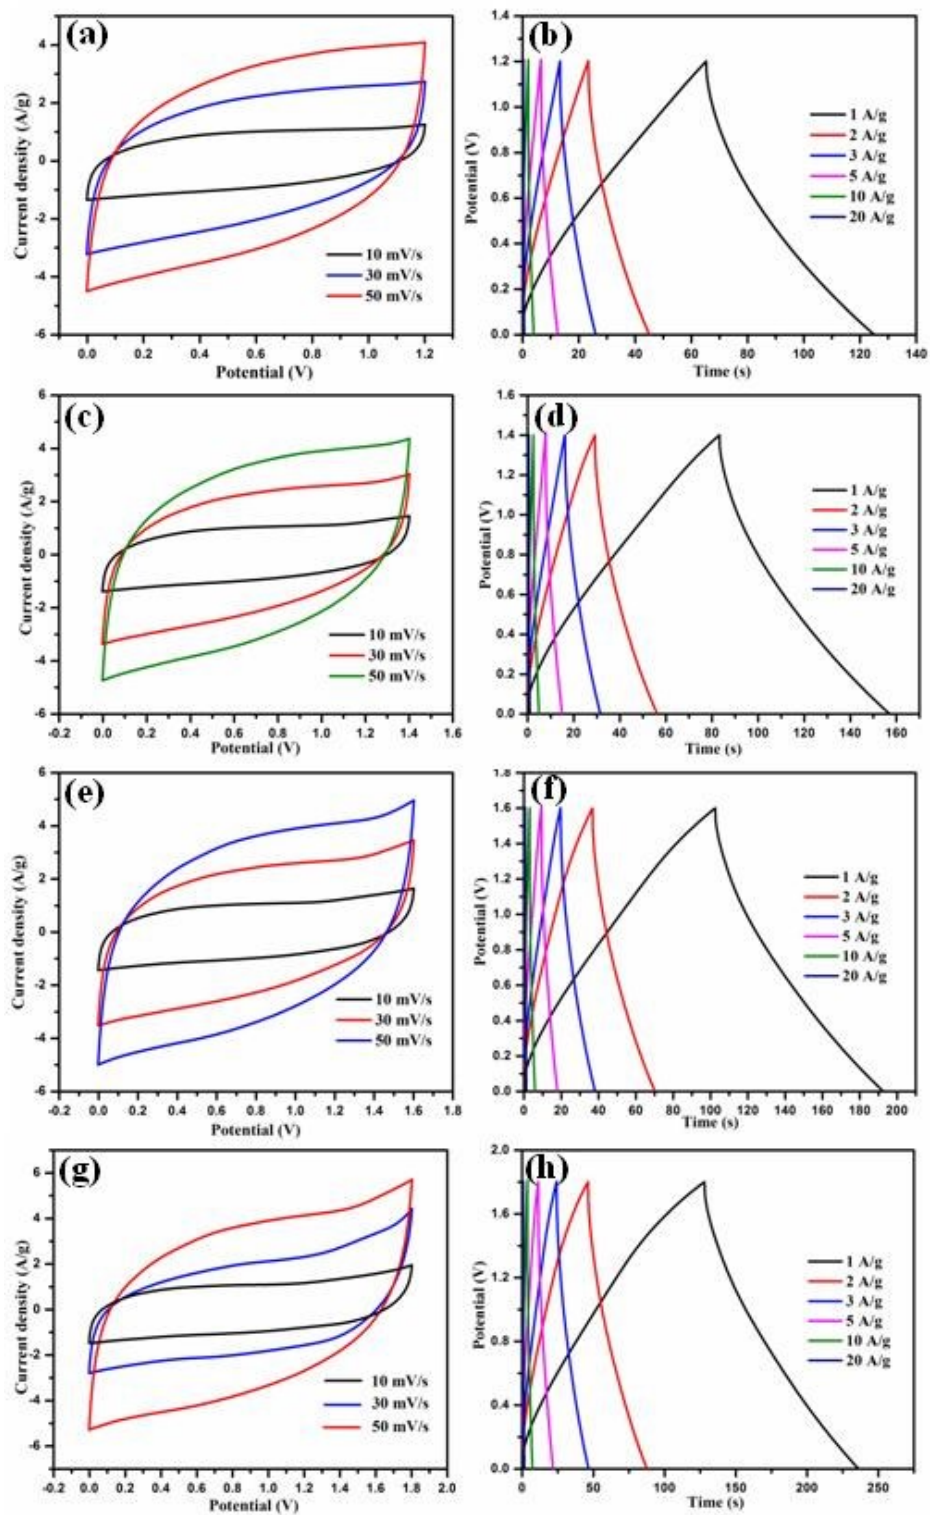

Fig.S3. ((a), (c), (e) and (g)) CV curves of R2//AC device at different cell voltages (1.2 to 2.0 V) at different scan rates from 10 to 50 mV/s ((b), (d), (f) and (h)) Charge-discharge curves of R2//AC device at current densities form 1 to 20 A/g, respectively
